# Supplementary material for: Modeling synovial sarcoma metastasis in the mouse: PI3′-lipid signaling and inflammation
Source: PubMed Central journal article supplement — J Exp Med. 2016 Dec 12;213(13):2989–3005. doi: 10.1084/jem.20160817 (PMC5154942; doi:10.1084/jem.20160817), 2016-12-12
Supplement: JEM_20160817_sm.pdf [file JEM_20160817_sm.pdf]

SUPPLEMENTAL MATERIAL

Barrott et al., <https://dx.doi.org/10.1084/jem.20160817>

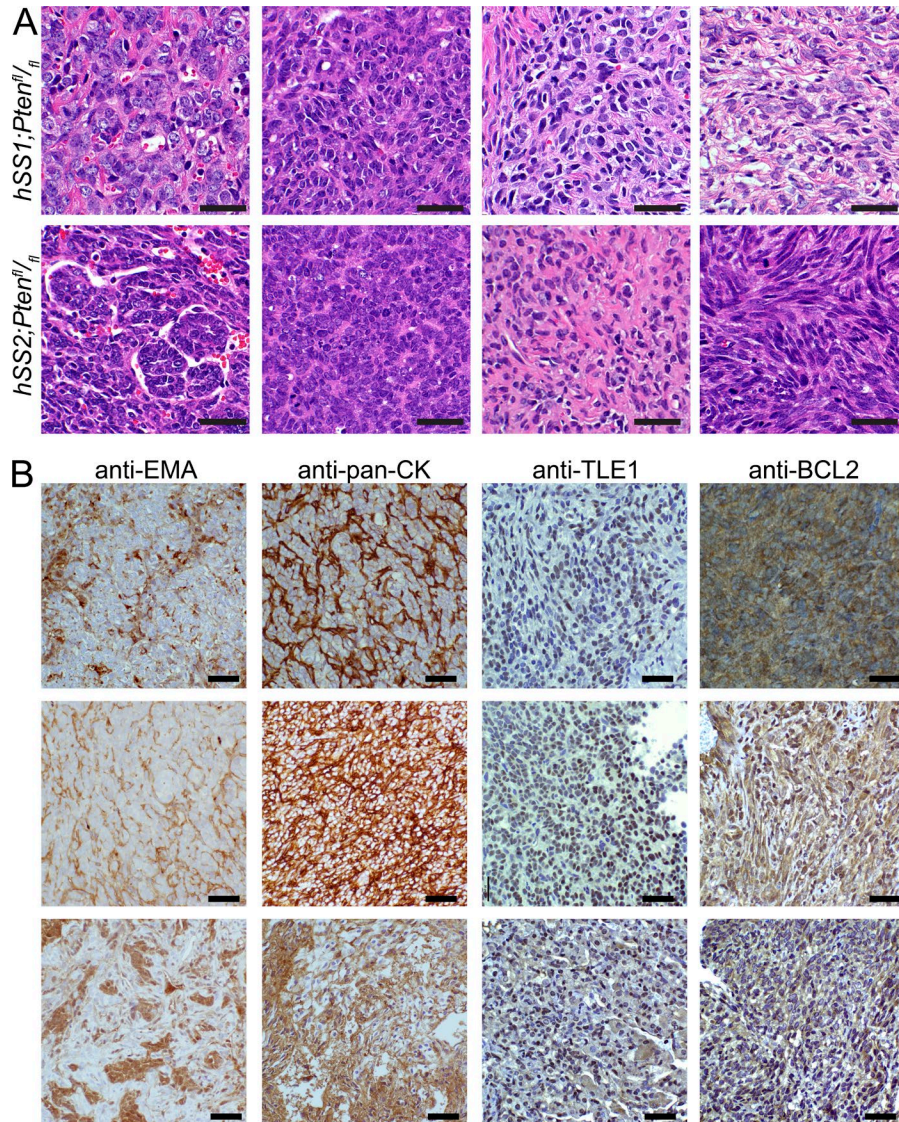

Figure S1. ***Pten* disruption enhances synovial sarcomagenesis.** (A) Photomicrographs of H&E histology demonstrating the range of mesenchymal and epithelial characteristics in *SS18-SSX*-induced synovial sarcomas from each *Pten* genotype in TATCre-injected mice. (B) Photomicrographs after immunohistochemistry on *hSS;Pten<sup>fl/fl</sup>* tumor tissue sections with noted primary antibodies, demonstrating characteristic SS staining patterns. Bars, 25  $\mu$ m.

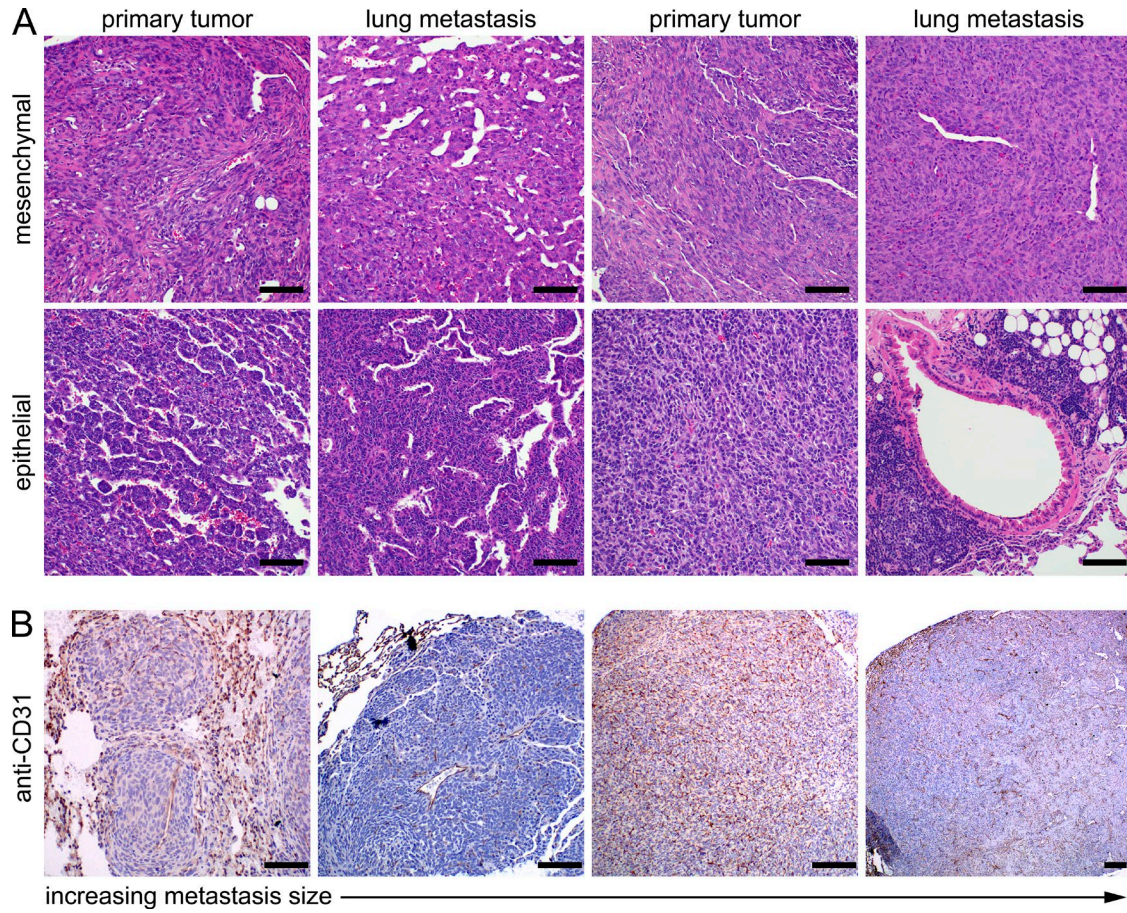

Figure S2. **Lung metastases retain primary tumor histology and E-cadherin expression and increases in vascularity with size.** (A) Photomicrographs of tumors with retained histological appearance between primary tumor and metastasis. (B) Examples of anti-CD31 immunohistochemistry photomicrographs demonstrating vascular density in *hSS;Pten* lung metastases. Bars, 100  $\mu$ m.

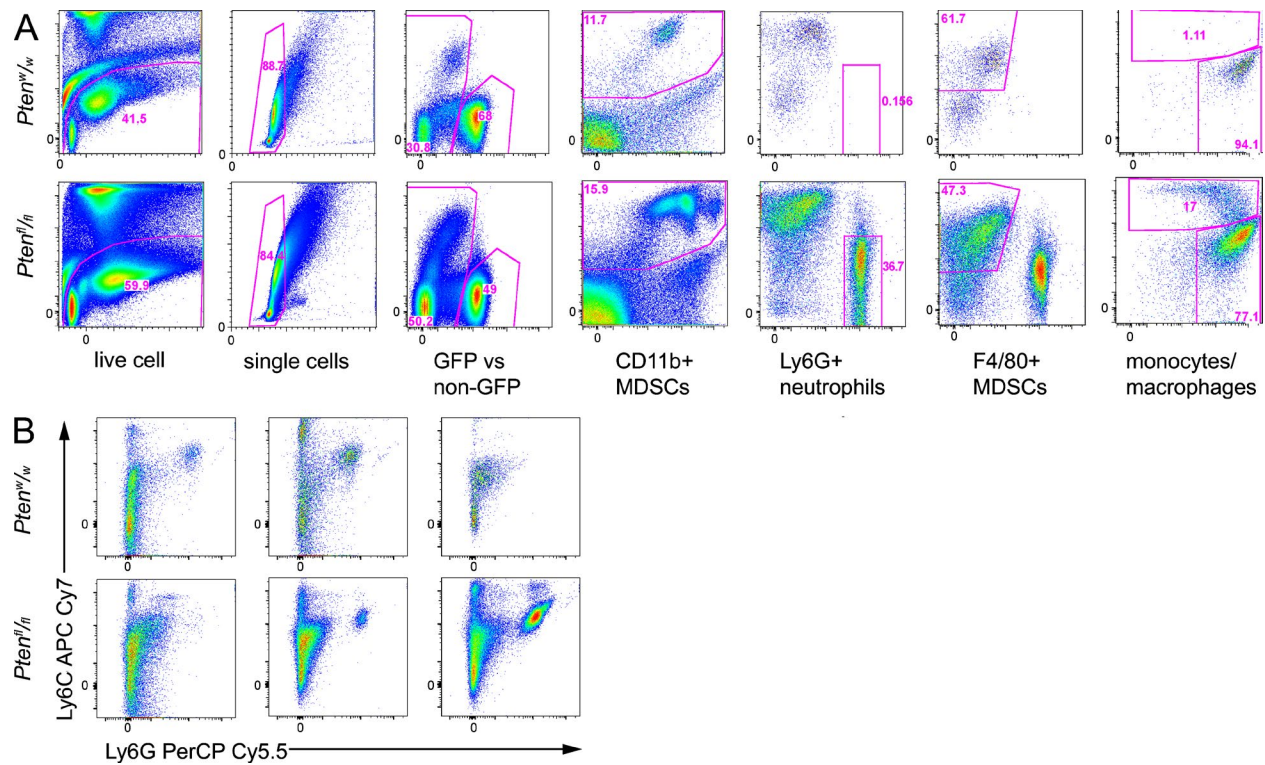

Figure S3. ***Pten* disruption associates with increased infiltration of myeloid-derived cells.** (A) Example flow cytometry comparing an *hSS;Pten<sup>w/w</sup>* tumor (top) to an *hSS;Pten<sup>fl/fl</sup>* tumor (bottom) for showing the hierarchical gates used for sorting F4/80<sup>+</sup>/GFP<sup>-</sup> monocytes/macrophages (sixth plot), their MHCII<sup>+</sup>/Ly6C<sup>high</sup> newly recruited monocyte (seventh) and MHCII<sup>+</sup>/Ly6C<sup>mid</sup> tissue macrophage (seventh plot) subpopulations, and Ly6C<sup>+</sup>/Ly6G<sup>+</sup> neutrophils (fifth plot). (B) Examples of CD11b<sup>+</sup> flow cytometry comparing *hSS;Pten<sup>w/w</sup>* tumors (top) to *hSS;Pten<sup>fl/fl</sup>* tumors (bottom). Current display demonstrates Ly6C<sup>+</sup>/Ly6G<sup>+</sup> neutrophils, Ly6C<sup>high</sup>/Ly6G<sup>-</sup> monocytes, and Ly6C<sup>mid</sup>/Ly6G<sup>-</sup> macrophages.

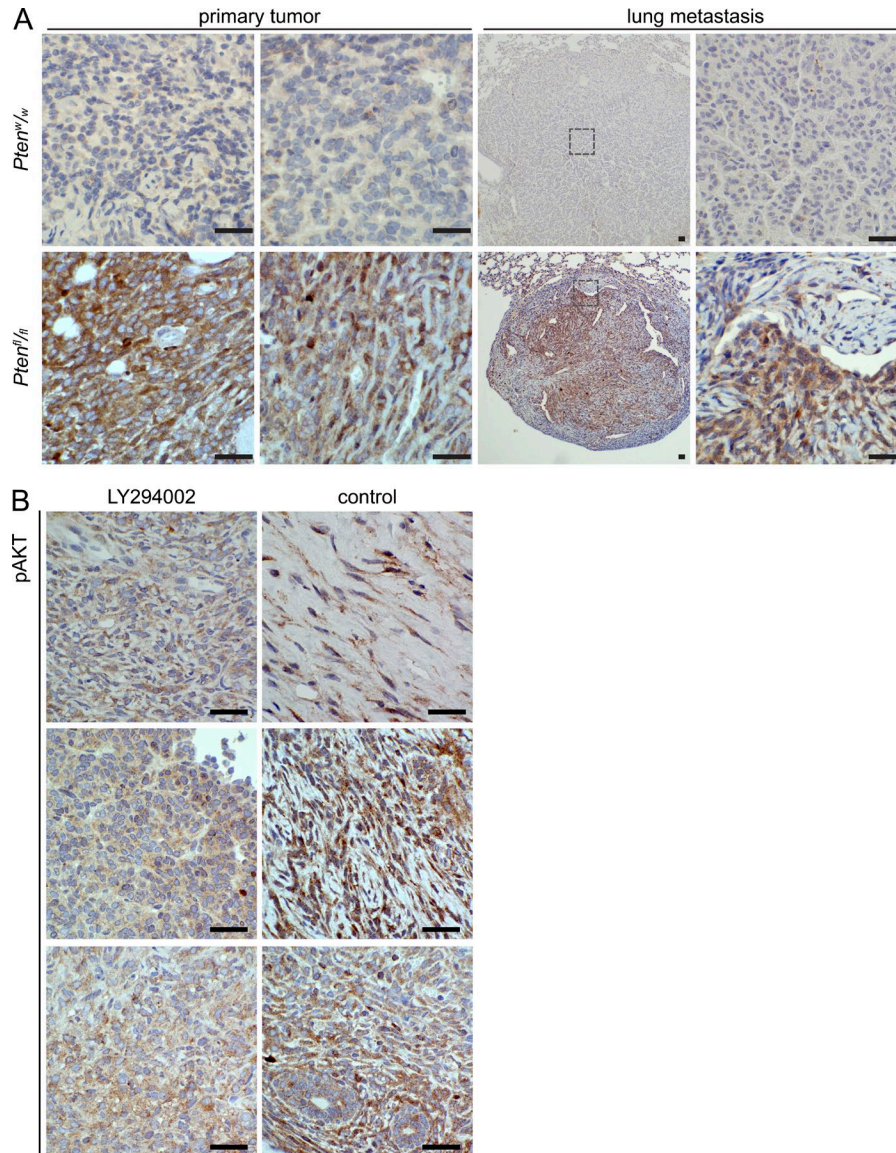

Figure S4. **PI3'-lipid signaling drives phosphorylation of AKT and downstream expression of CSF1.** (A) Representative photomicrographs of pAKT immunohistochemistry in *hSS;Pten<sup>w/w</sup>* and *hSS;Pten<sup>fl/fl</sup>* primary tumors (left) and *hSS;Pten<sup>fl/fl</sup>* lung metastasis (right). (B) Representative photomicrographs of pAKT immunohistochemistry in *hSS;Pten<sup>fl/fl</sup>* primary tumors after 1-wk treatment of LY294002 or control. Bars, 20  $\mu$ m.

Tables S1–S5 are available as Excel files. Table S1 lists differential gene expression between *Pten<sup>w/w</sup>* and *Pten<sup>fl/fl</sup>* synovial sarcomas. Table S2 lists Ingenuity pathway analysis of potential upstream regulators between *Pten<sup>w/w</sup>* and *Pten<sup>fl/fl</sup>*. Table S3 lists differential gene expression between primary and lung metastases *Pten<sup>fl/fl</sup>* synovial sarcomas. Table S4 lists Ingenuity pathway analysis for potential upstream regulators between primary and lung metastases *Pten<sup>fl/fl</sup>* synovial sarcomas. Table S5 Nanostring gene expression on sorted cell populations with normalized values based on prevalence in flow cytometry.

Table S6. **Antibody list**

| Protein          | Company (cat. no.)                         | Application and dilution    |
|------------------|--------------------------------------------|-----------------------------|
| phospho-Akt      | Cell Signaling Technology (4060)           | WB (1:1,000)                |
| pan-Akt          | Cell Signaling Technology (4391)           | WB (1:1,000)                |
| phospho-PTEN     | Cell Signaling Technology (9551)           | WB (1:1,000)                |
| phospho-CSF1R    | Thermo Fisher Scientific (MA5-15151)       | WB (1:1,000) and IHC (1:50) |
| phospho-Akt      | Santa Cruz Biotechnology, Inc. (sc-135650) | WB (1:200) and IHC (1:50)   |
| GAPDH            | EMD Millipore (MAB374)                     | WB (1:500)                  |
| Ly-6C            | BD (560596)                                | Flow cytometry (1:1,000)    |
| CD11b            | BD (552850)                                | Flow cytometry (1:1,000)    |
| MHC II (I-A/I-E) | BD (562367)                                | Flow cytometry (1:1,000)    |
| F4/80            | BD (565410)                                | Flow cytometry (1:1,000)    |
| Ly-6G            | BD (560602)                                | Flow cytometry (1:1,000)    |
| E-cadherin       | R&D Systems (FAB7481A)                     | Flow cytometry (1:100)      |
| CD68             | Abcam (ab125212)                           | IHC (1:500)                 |
| CD3              | Abcam (ab16669)                            | IHC (1:200)                 |
| CD31             | Abcam (ab28364)                            | IHC (1:1,000)               |
| Ki67             | Abcam (ab15580)                            | IHC (1:1,000)               |
| GFP              | Santa Cruz Biotechnologies, Inc. (sc-8334) | IHC (1:100)                 |
| BCL-2            | Dako (M0887)                               | IHC (1:100)                 |
| Pan-CK           | EMD Millipore (MAB3412)                    | IHC (1:1,000)               |
| TLE1             | Santa Cruz Biotechnology, Inc. (sc-9121)   | IHC (1:100)                 |
| EMA              | Dako (M0613)                               | IHC (1:100)                 |

Table S7. **Primer list**

| Gene                  | Forward sequence (5'-3')  | Reverse sequence (5'-3') |
|-----------------------|---------------------------|--------------------------|
| Rosa26-LSL            | GGATCGACGGTATCGTAGAG      | CGCGAAAGCCACAGACATGTT    |
| CSF1 (mouse)          | ACAACACCCCCAATGCTAAC      | GCTGTTGTTGCAGTTCCTGG     |
| CSF1 (human)          | GGAGTCTGTCTCCACCTGC       | GAATCCGCTCTCTGAGGCTC     |
| GAPDH (mouse)         | TGTCAGCAATGCATCCTGCA      | CCGTTCCAGCTCTGGGATGAC    |
| GAPDH (human)         | GTCAAGGCTGAGAACGGGAA      | GCCTTCTCCATGGTGGTGAA     |
| Rosa wt (genotyping)  | GTTATCAGTAAGGGAGCTGCAGTGG | GGCGGATCACAAGCAATAATAACC |
| Rosa lox (genotyping) | AAGACCGGAAGAGTTTGTCTC     | GGCGGATCACAAGCAATAATAACC |
| Pten (genotyping)     | CAAGCACTCTGCGAACTGAG      | AAGTTTTTGAAGCAAGATGC     |
